# Supplementary figures and images for: Temporally delayed linear modelling (TDLM) measures replay in both animals and humans
Source: eLife journal article supplement (doi:10.7554/elife.66917), 2021-06-07

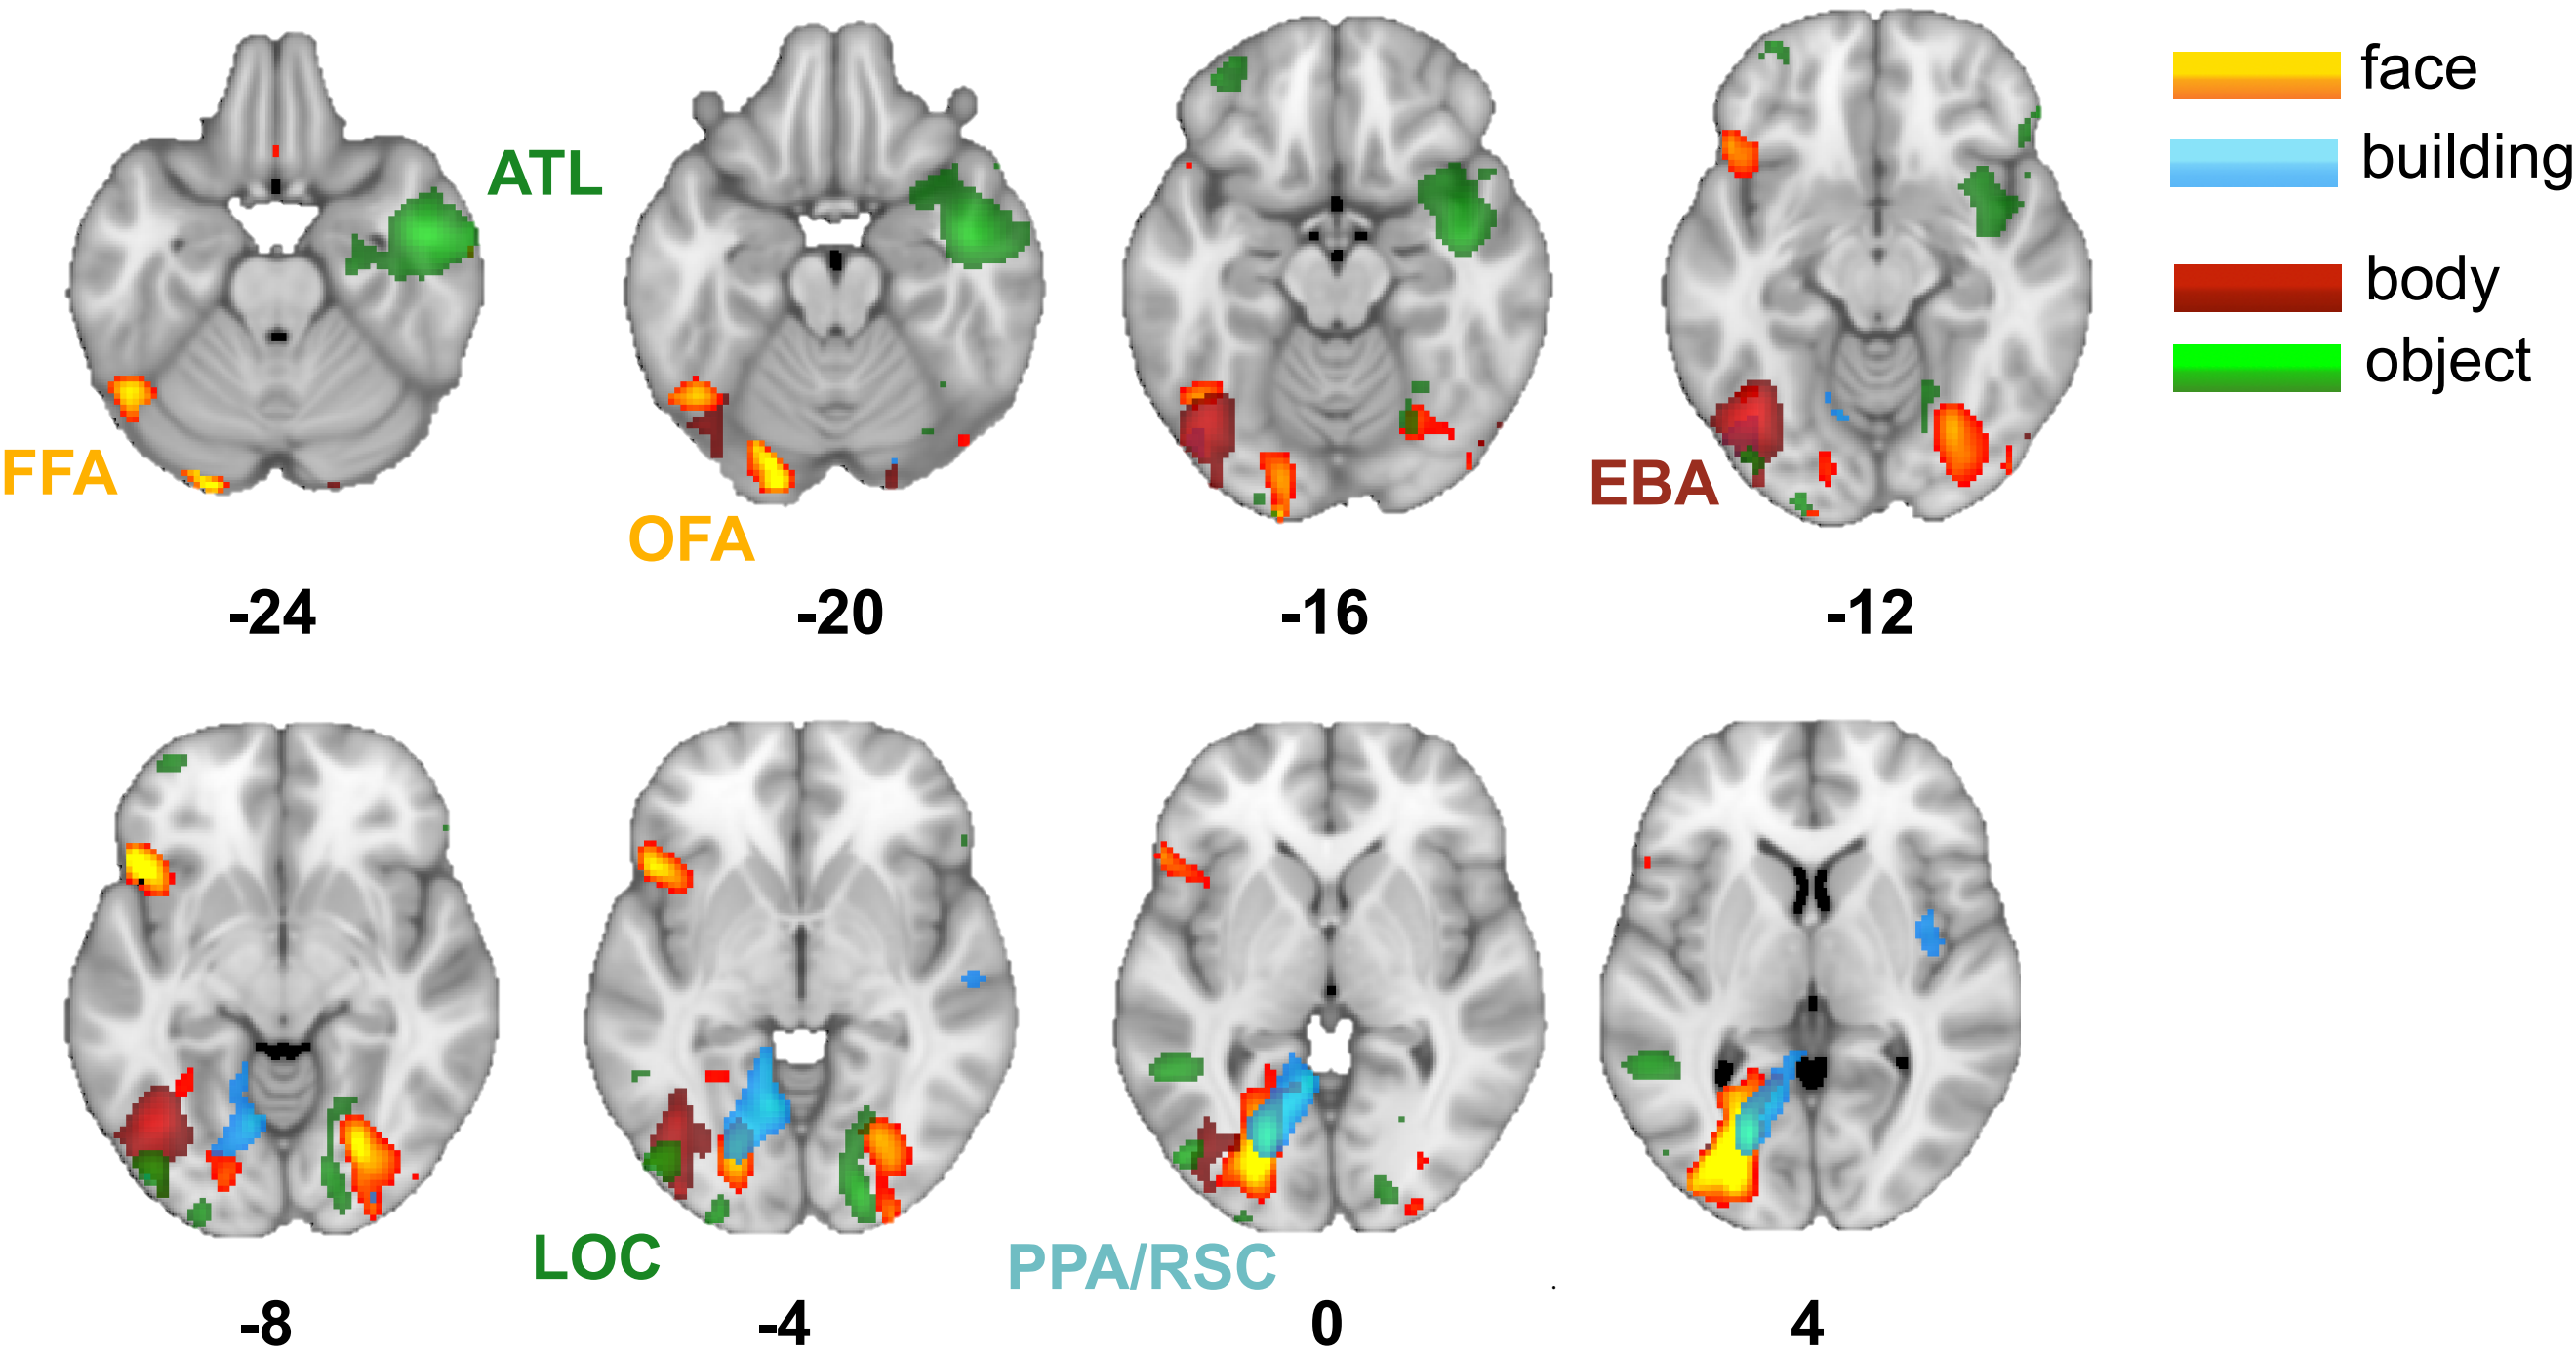

Supplement: supp [file elife-66917-supp-v1.zip]

a.

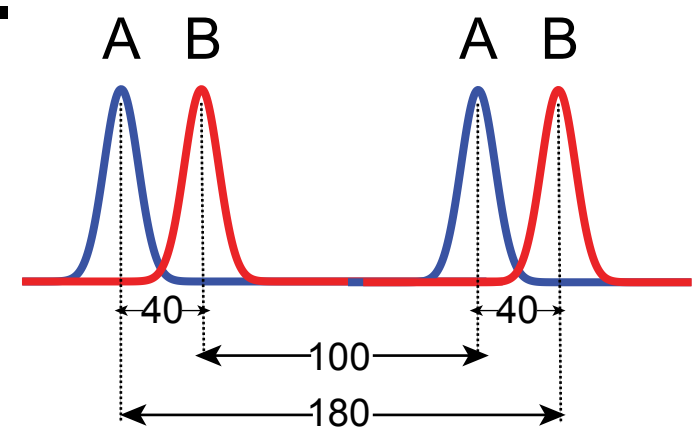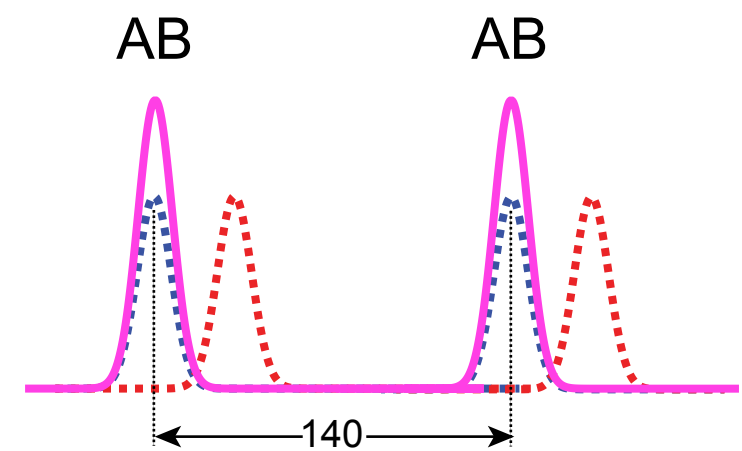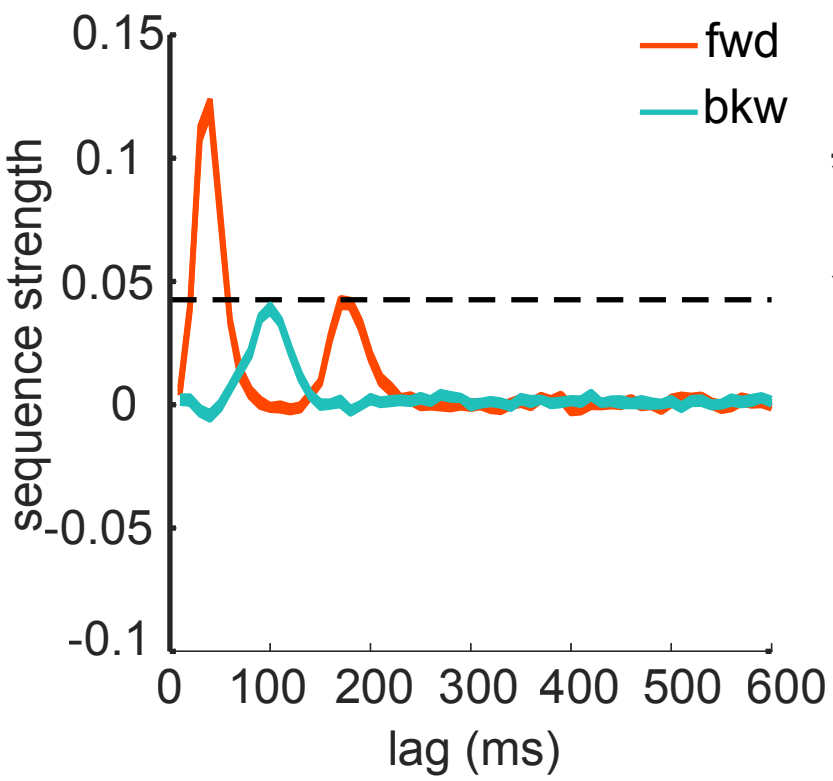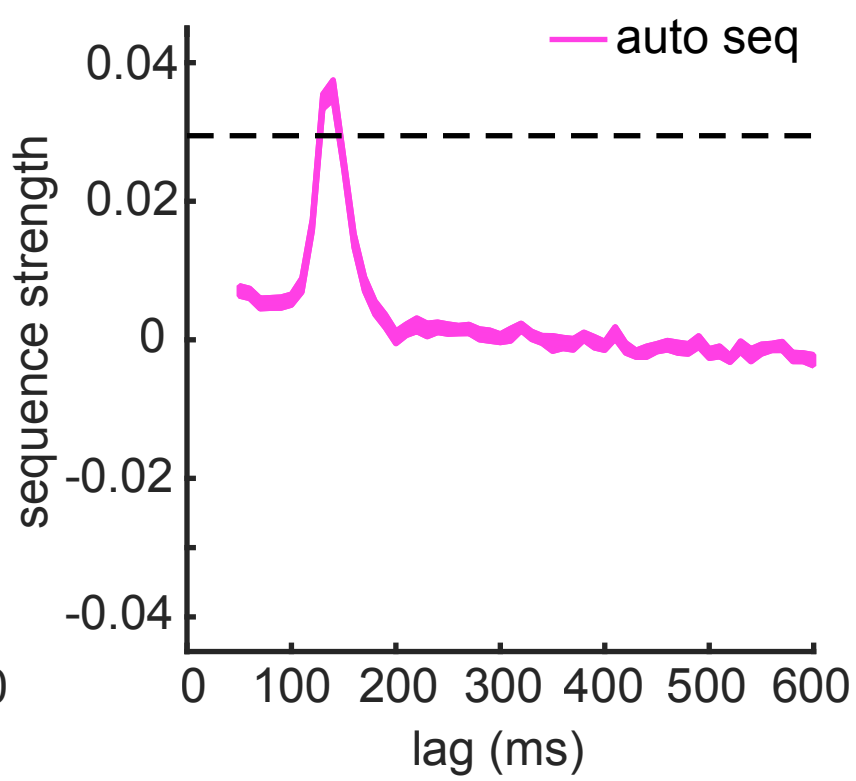

b.

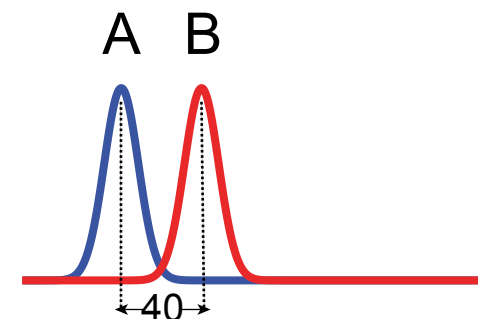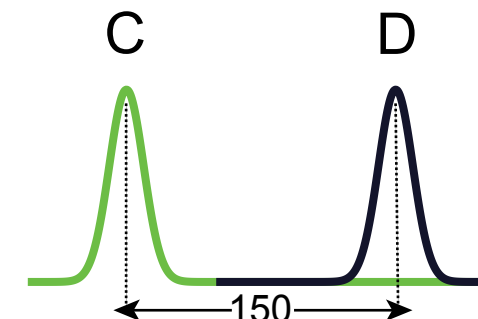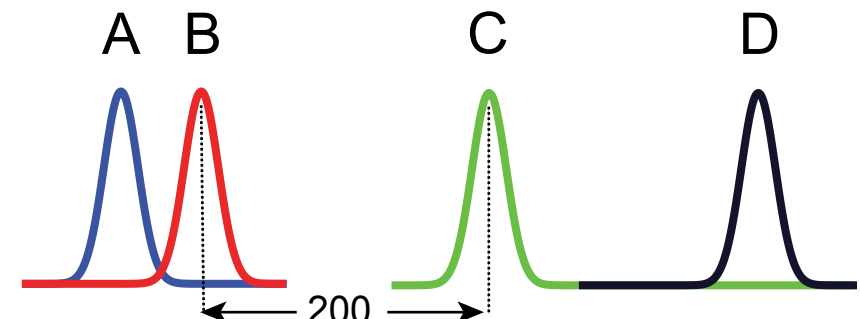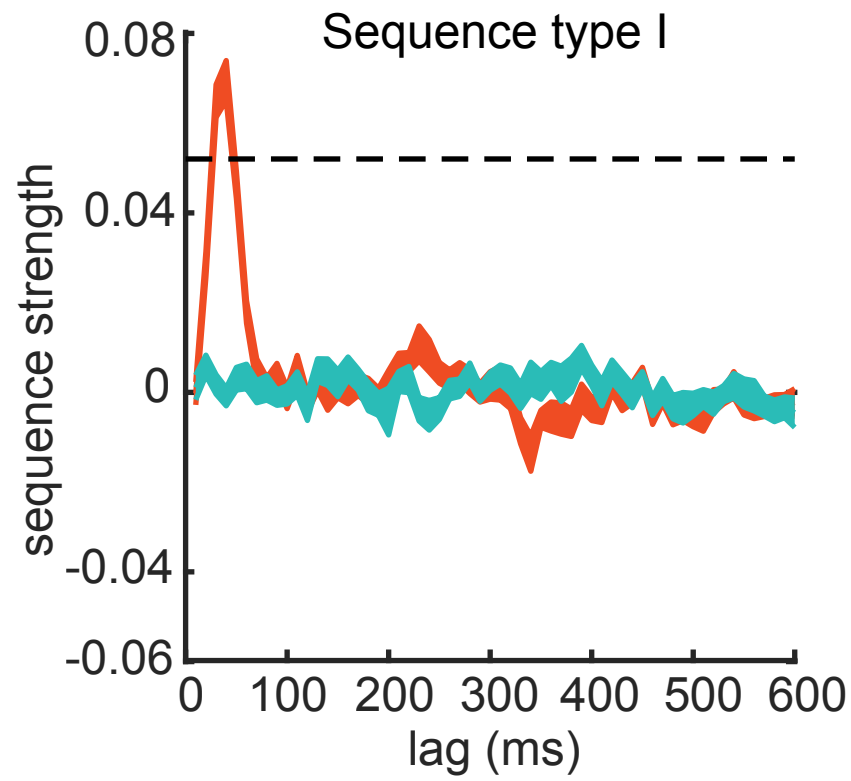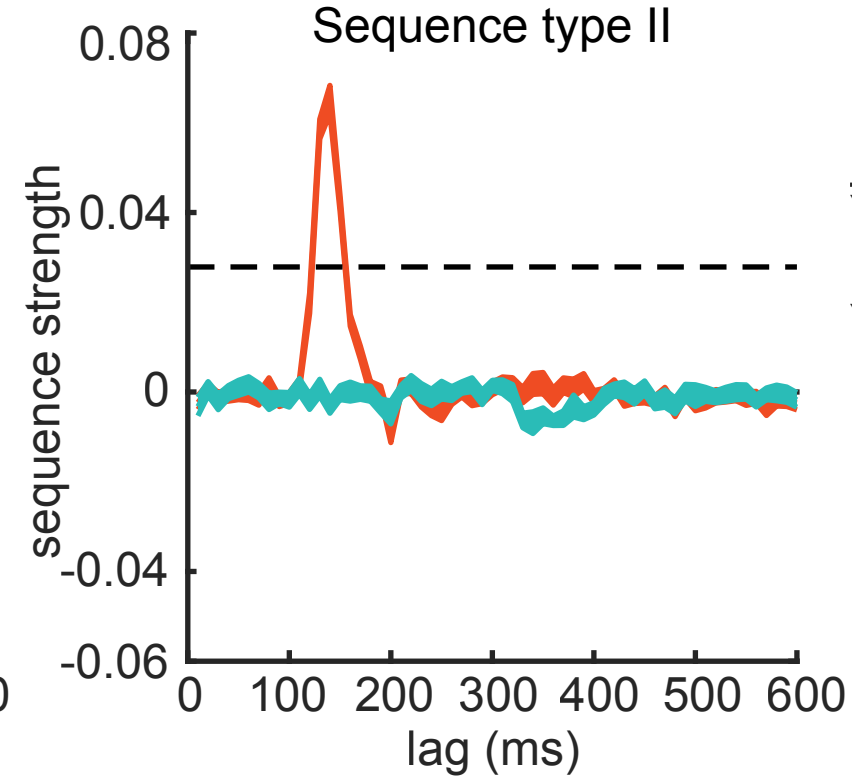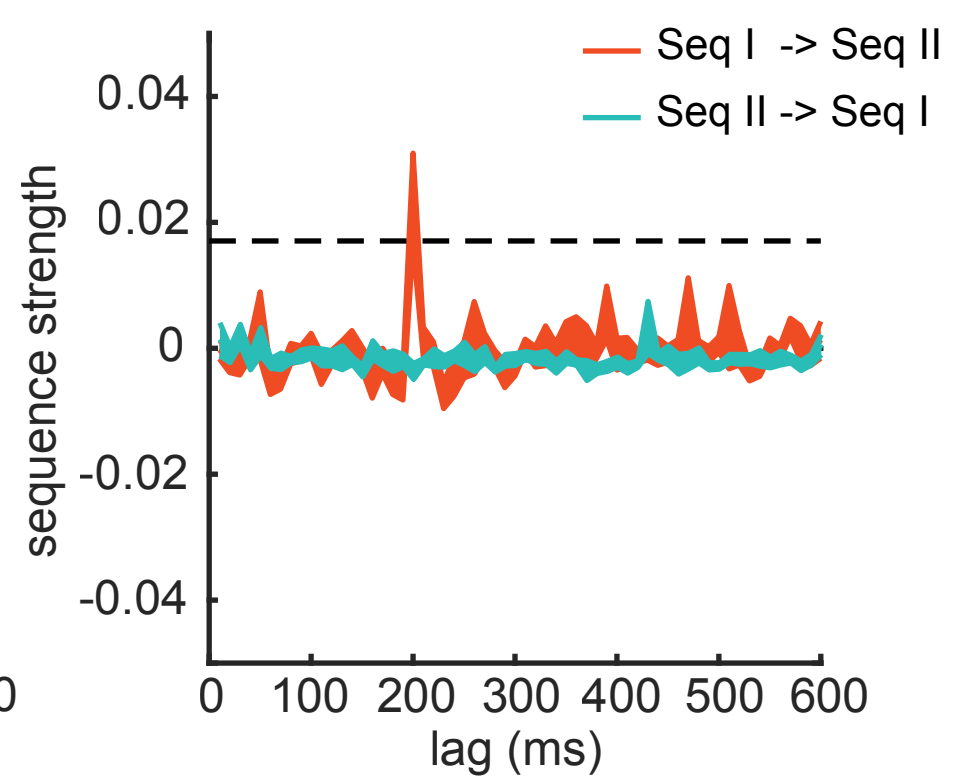

Supplement: supp [file elife-66917-supp-v1.zip]

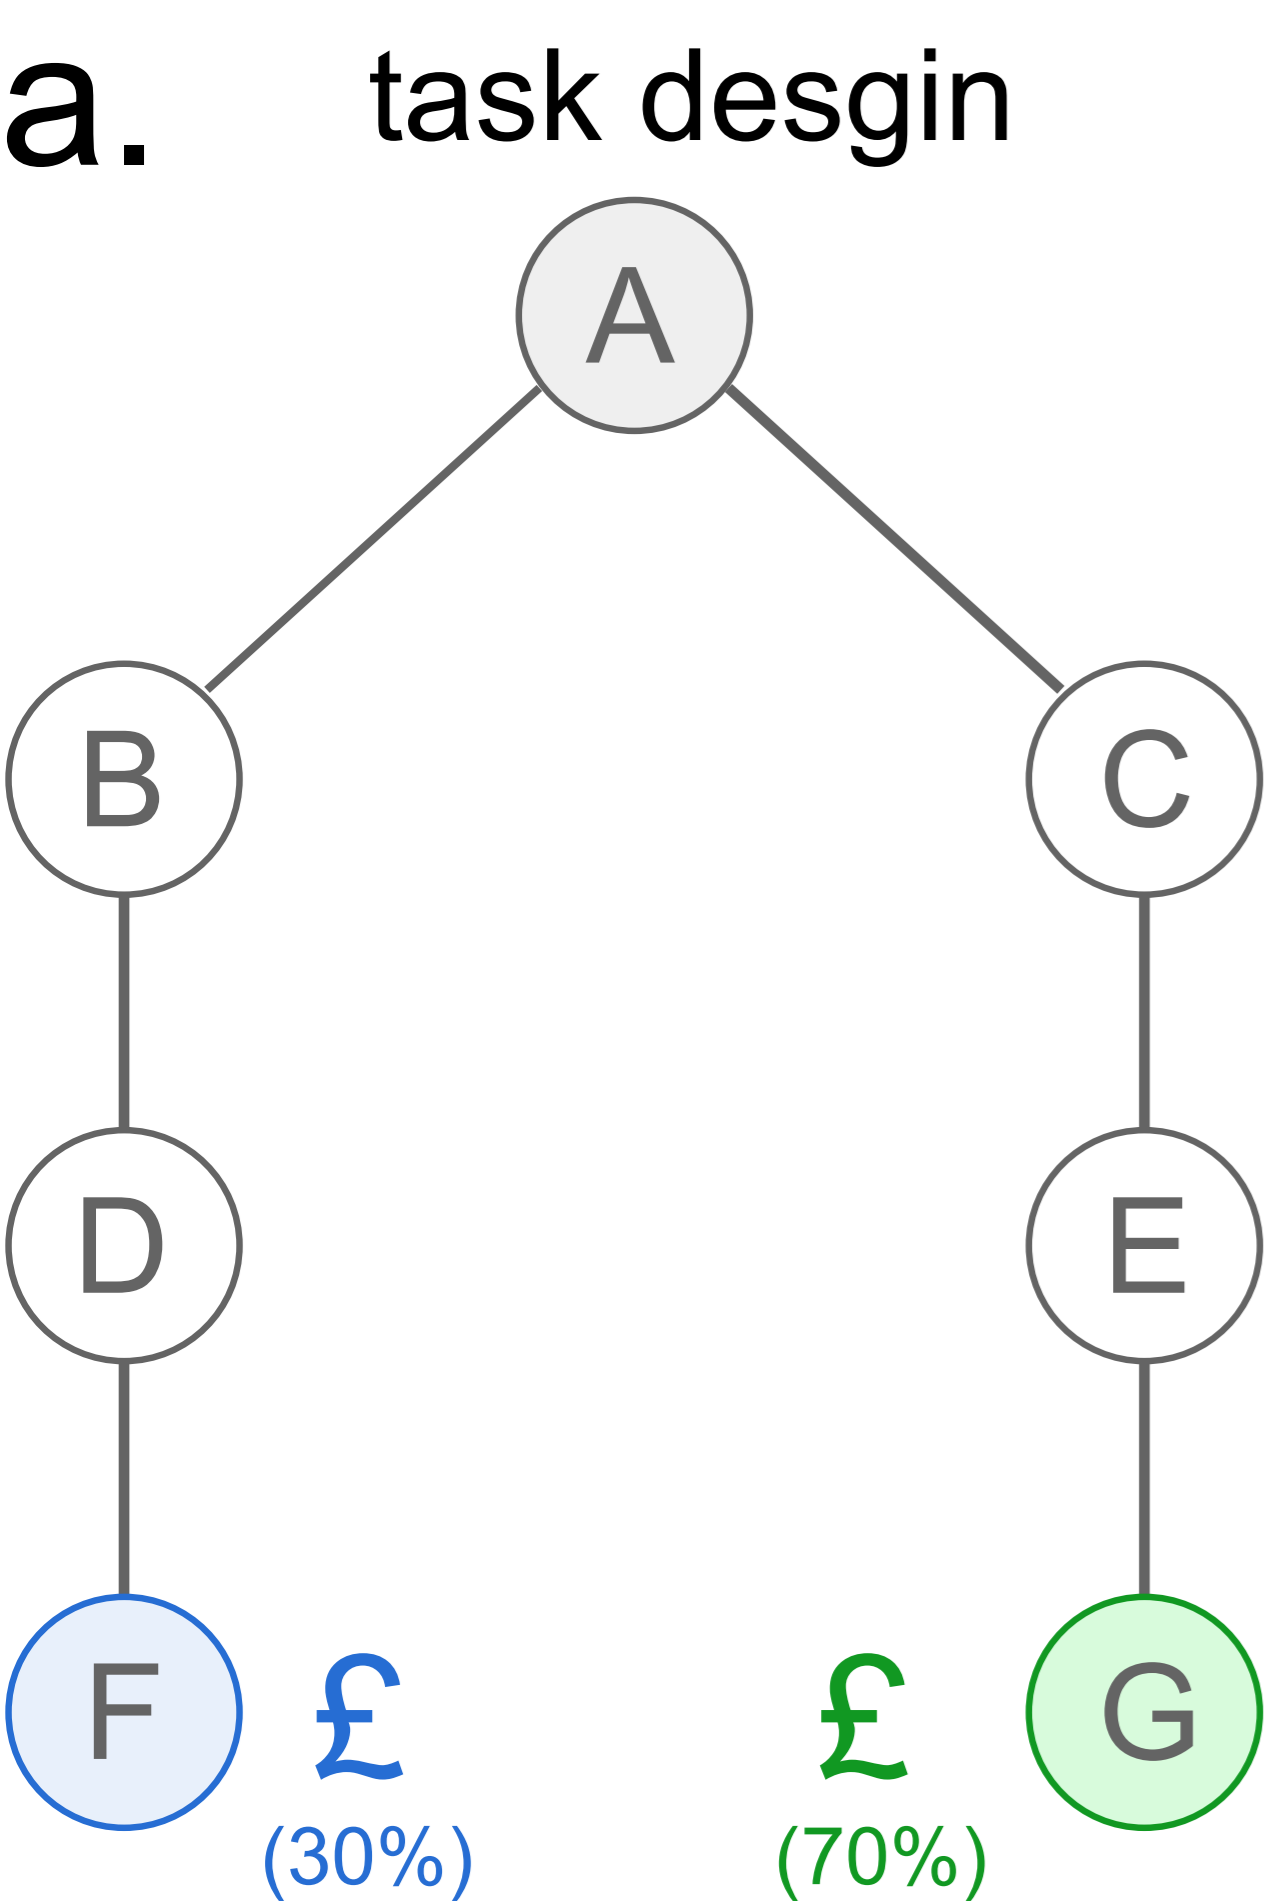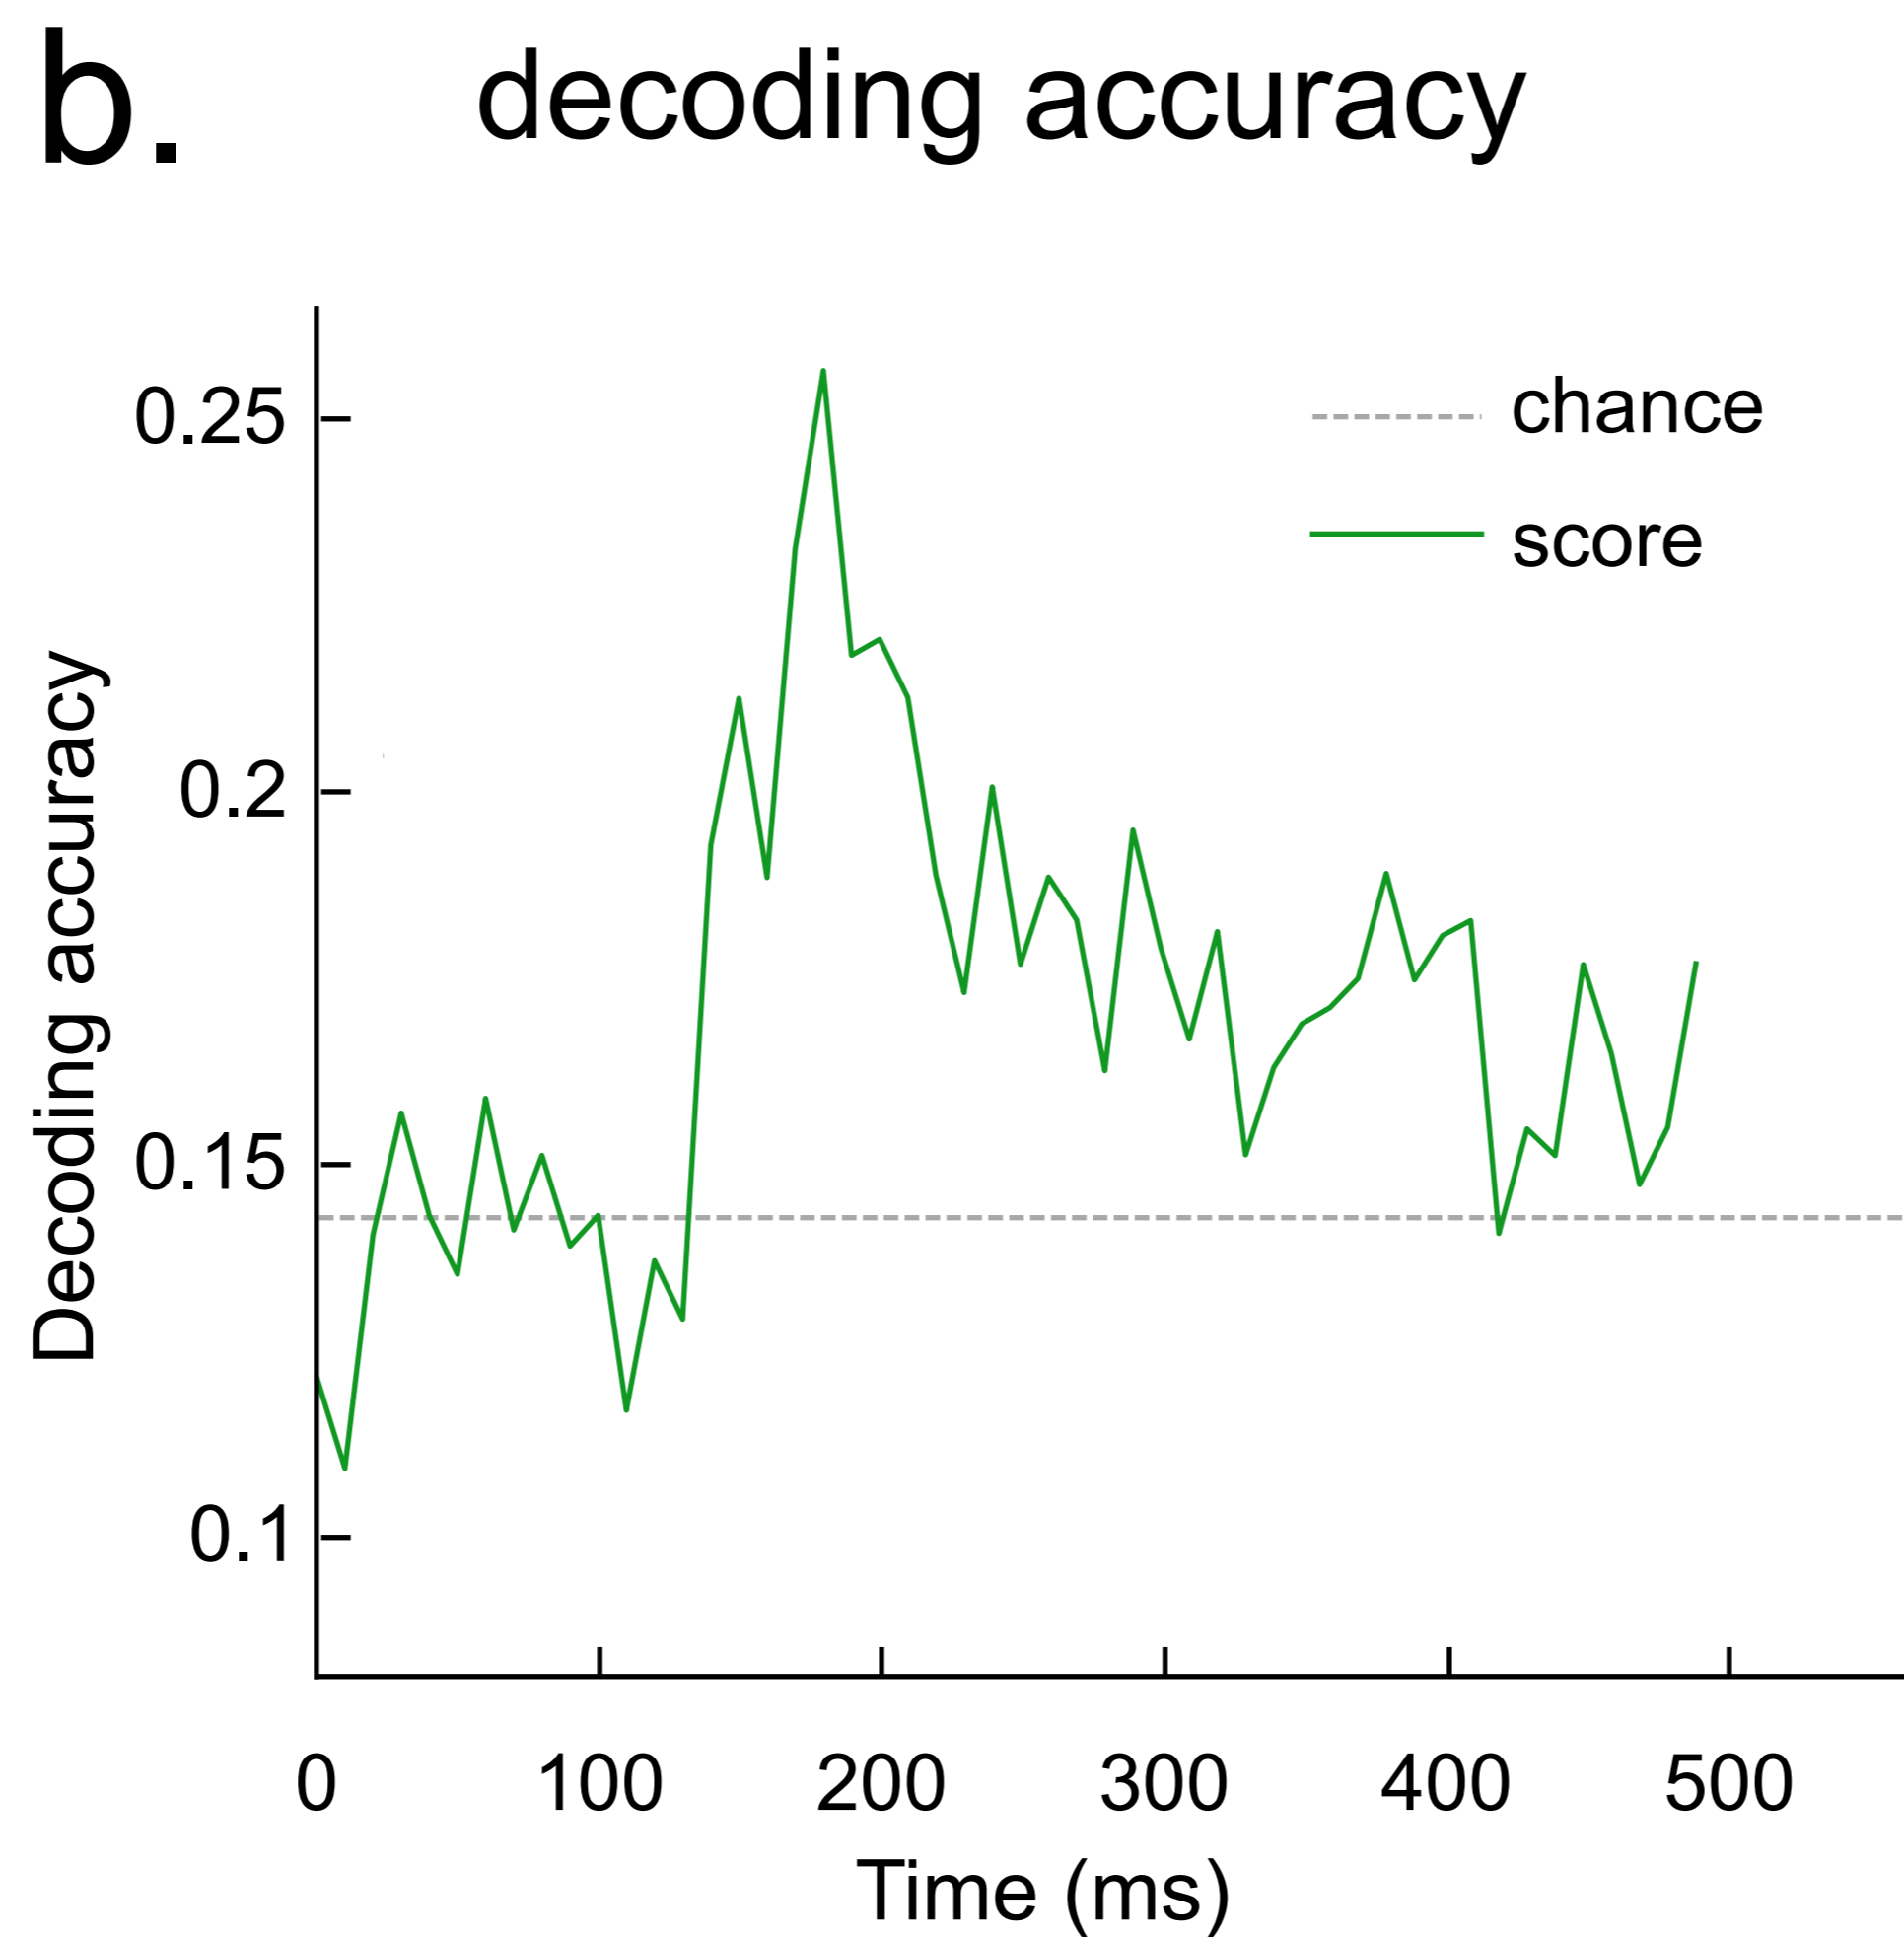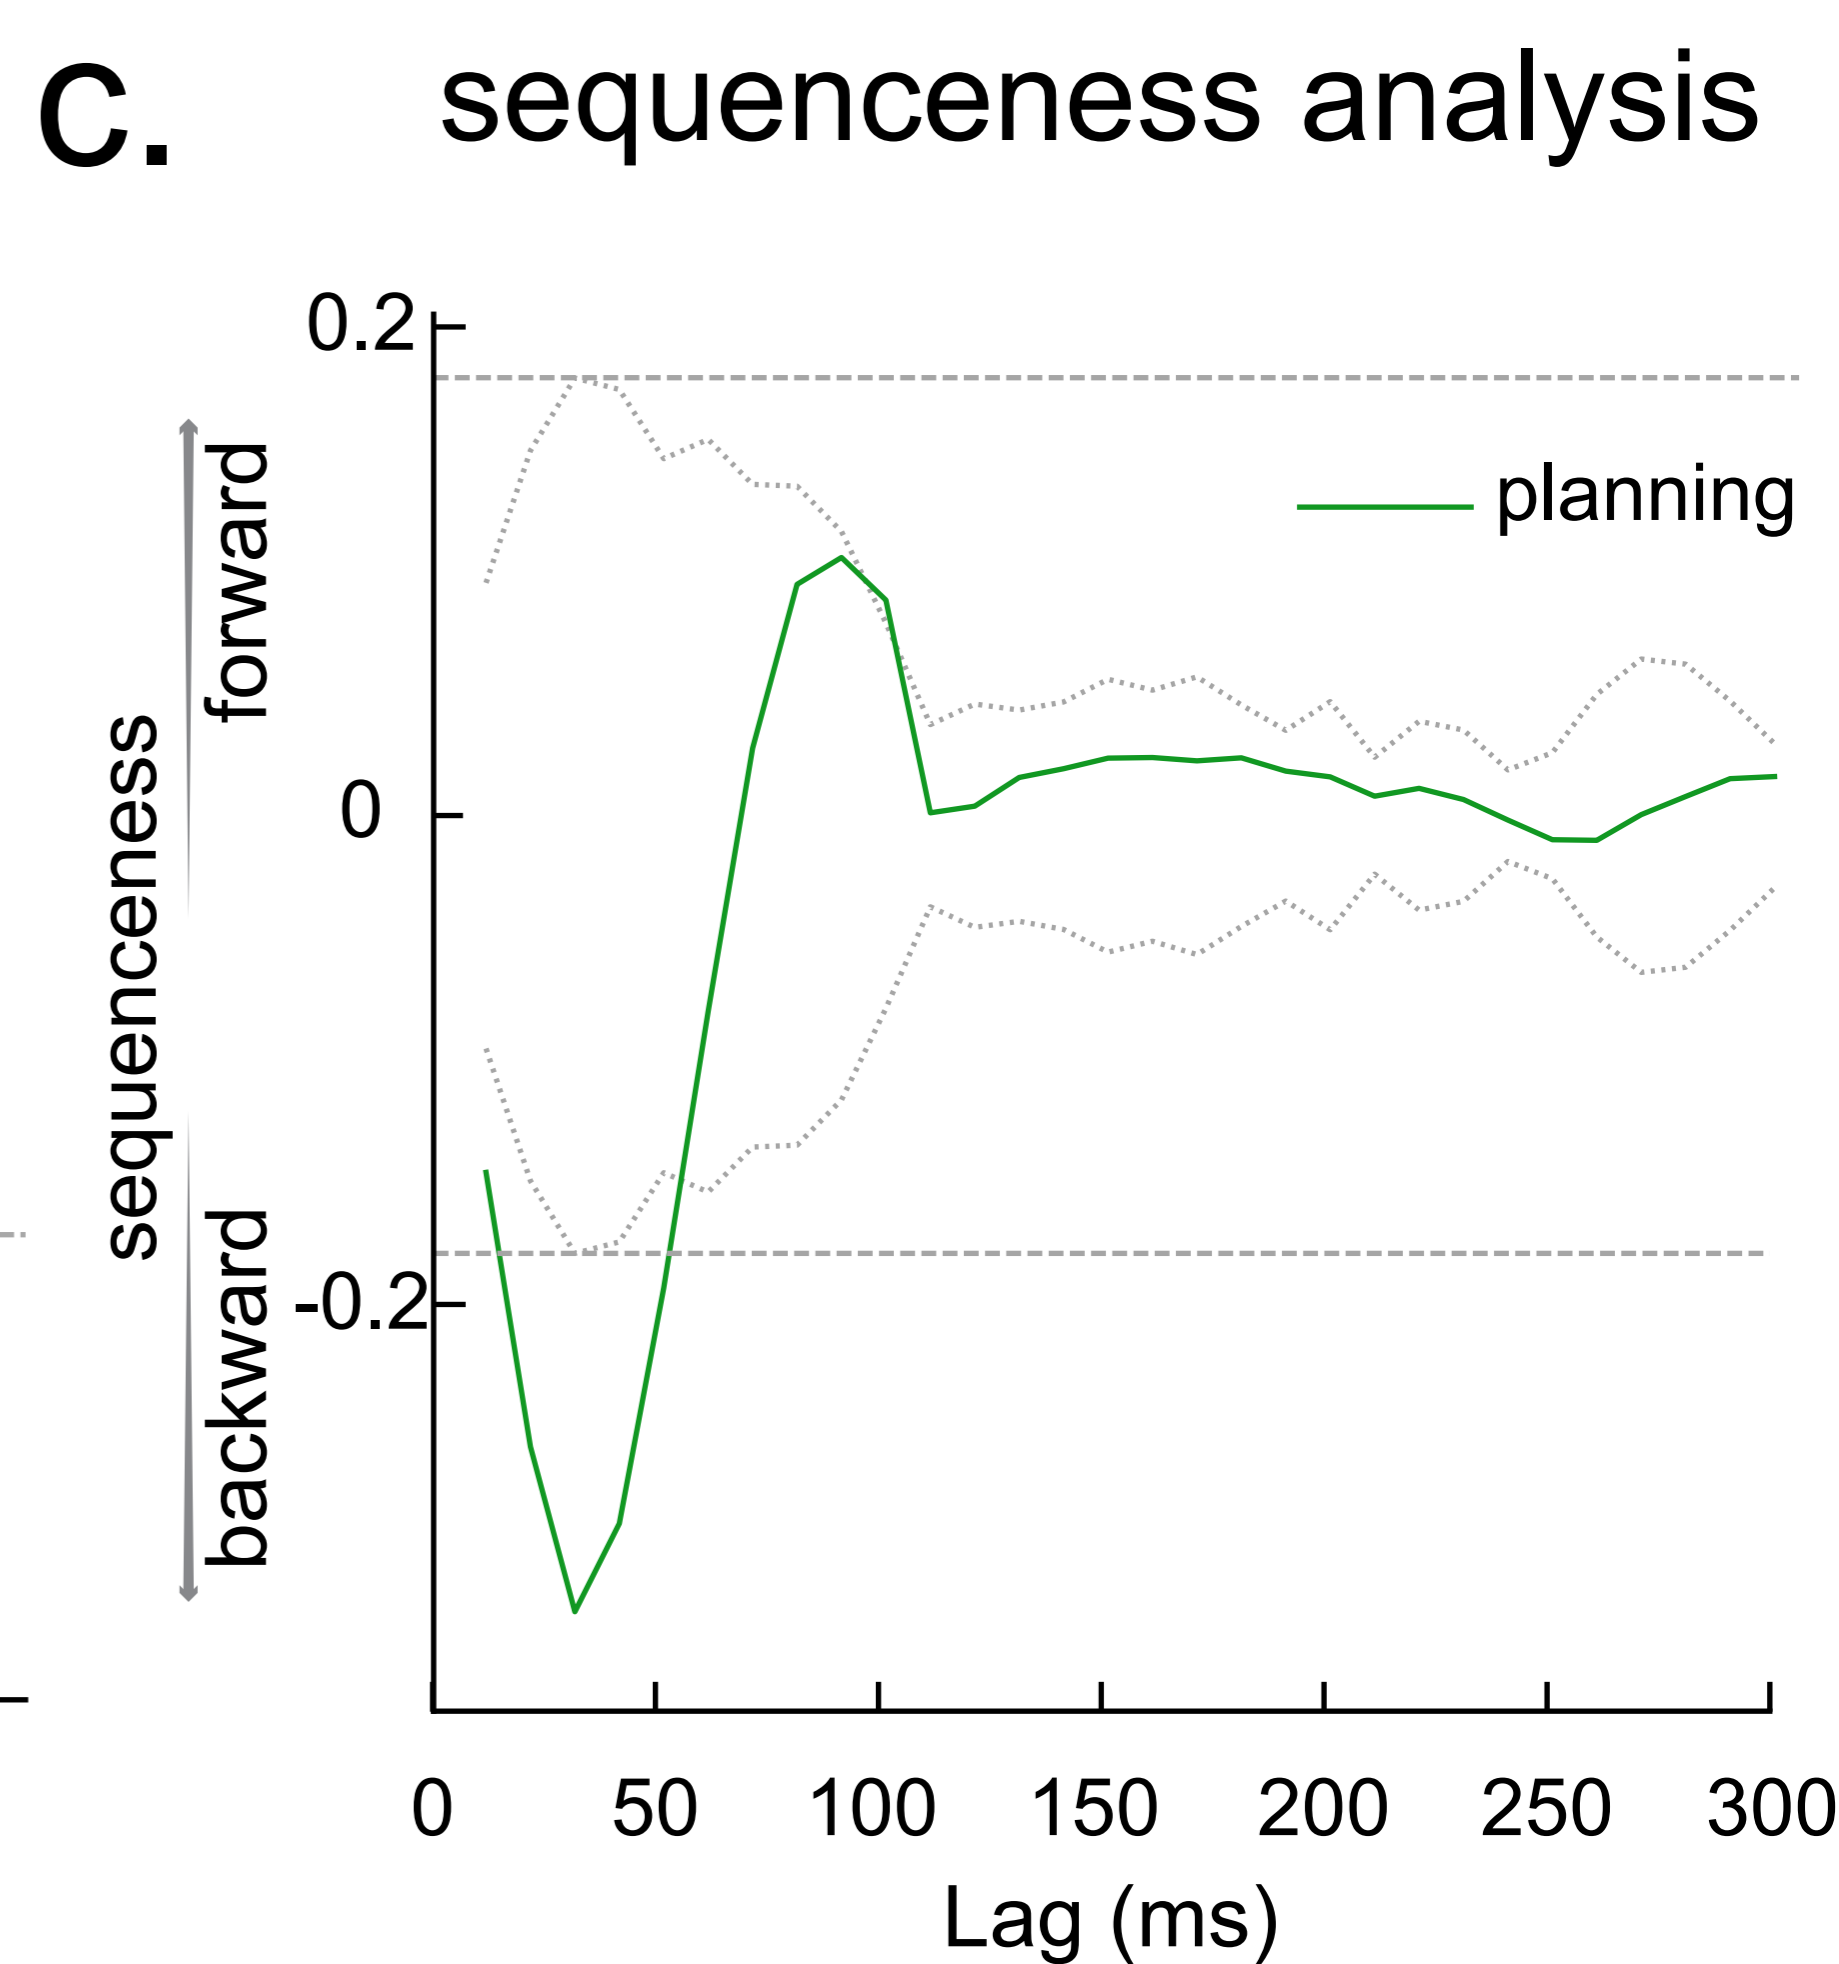

Supplement: supp [file elife-66917-supp-v1.zip]

**a.**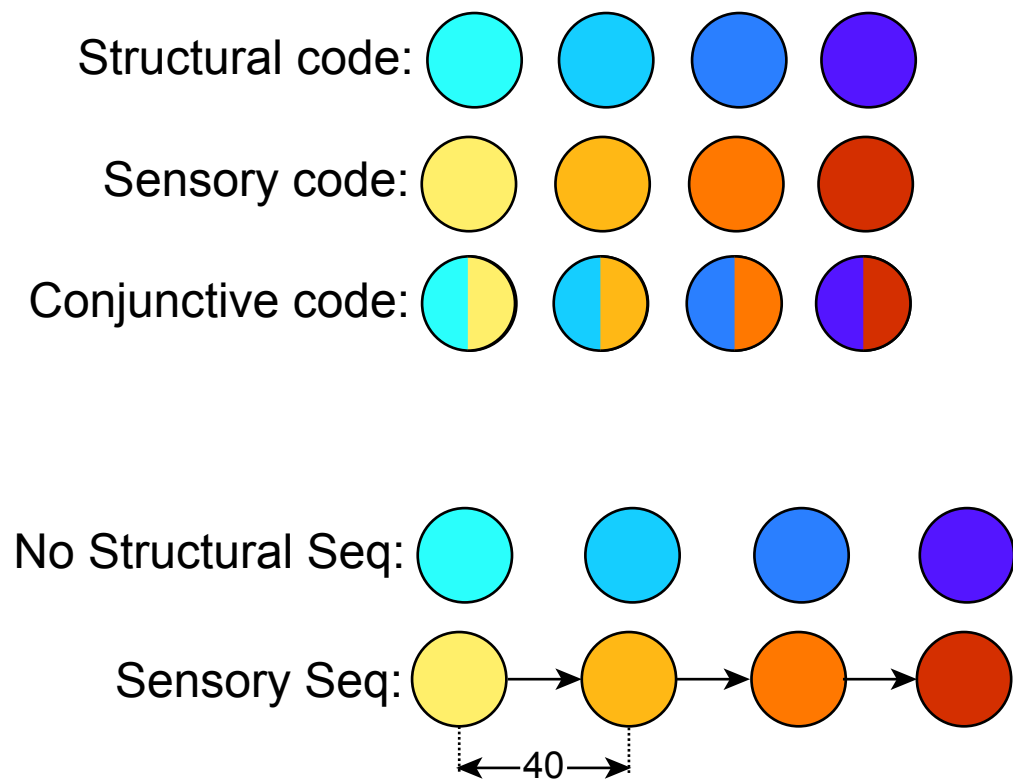**b.**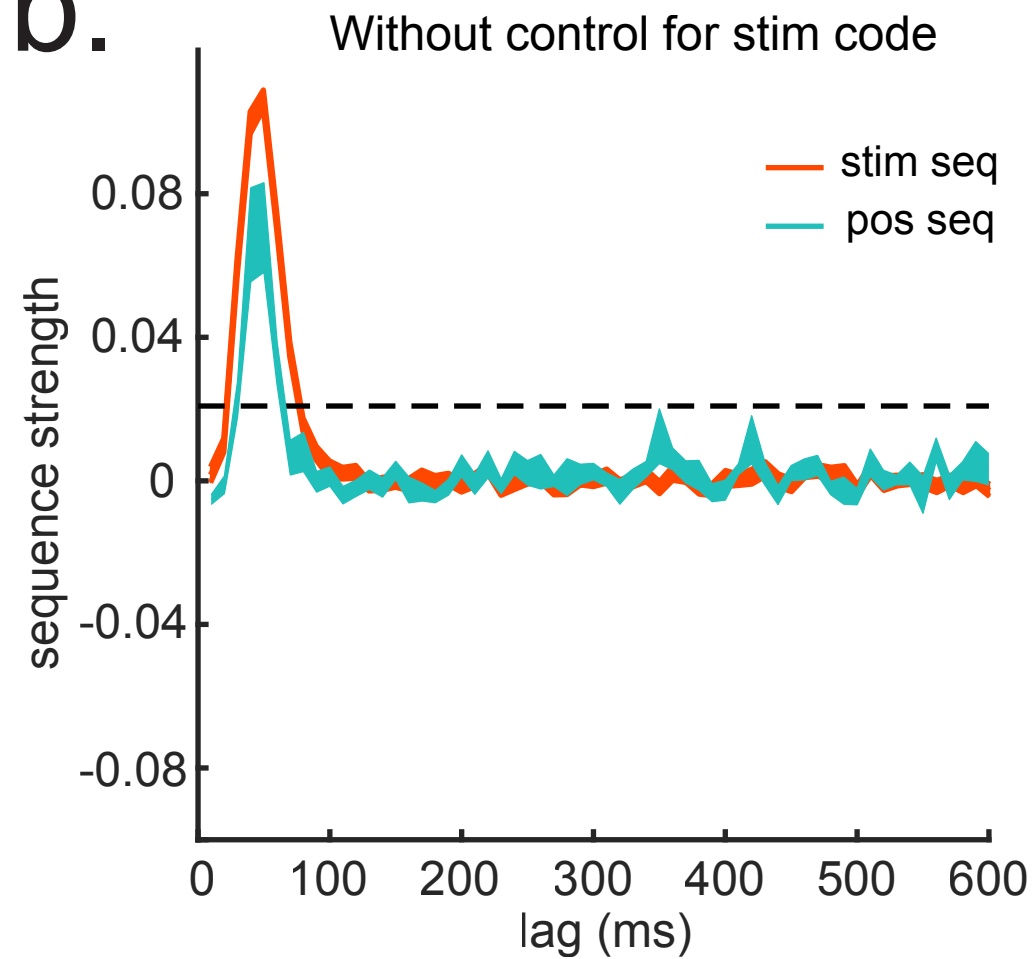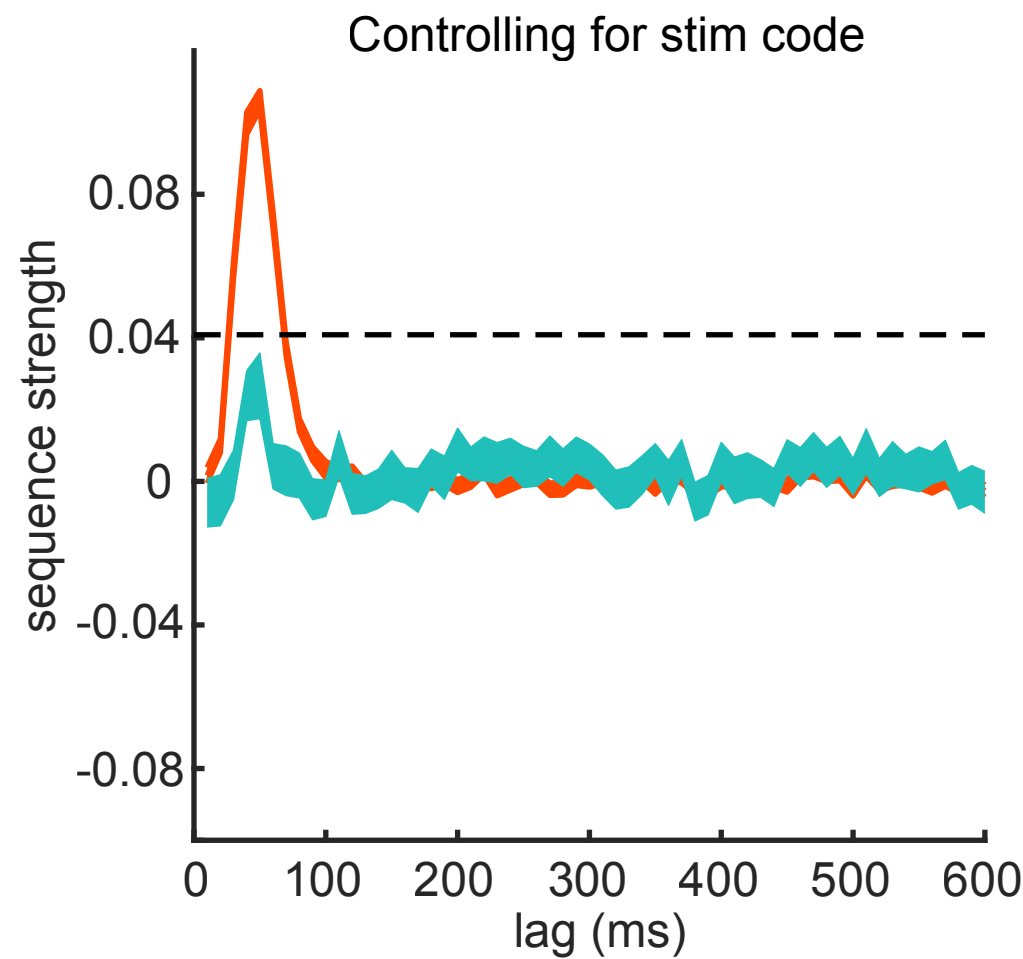

Supplement: supp [file elife-66917-supp-v1.zip]

**a.**

Len-3 sequence  
(ground truth: len-2)

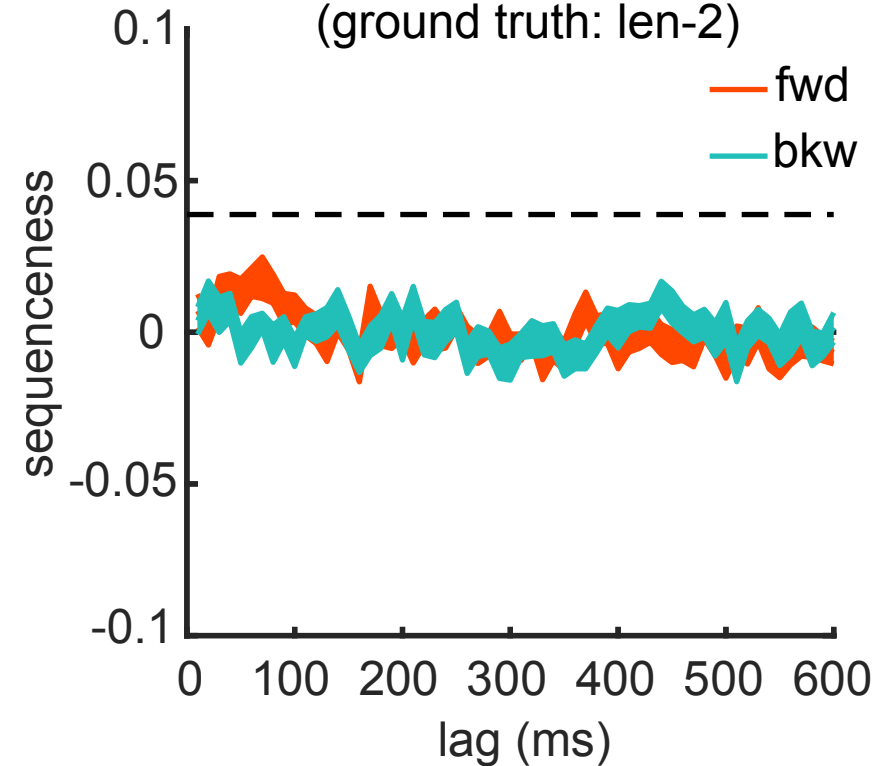

Len-3 sequence  
(ground truth: len-3)

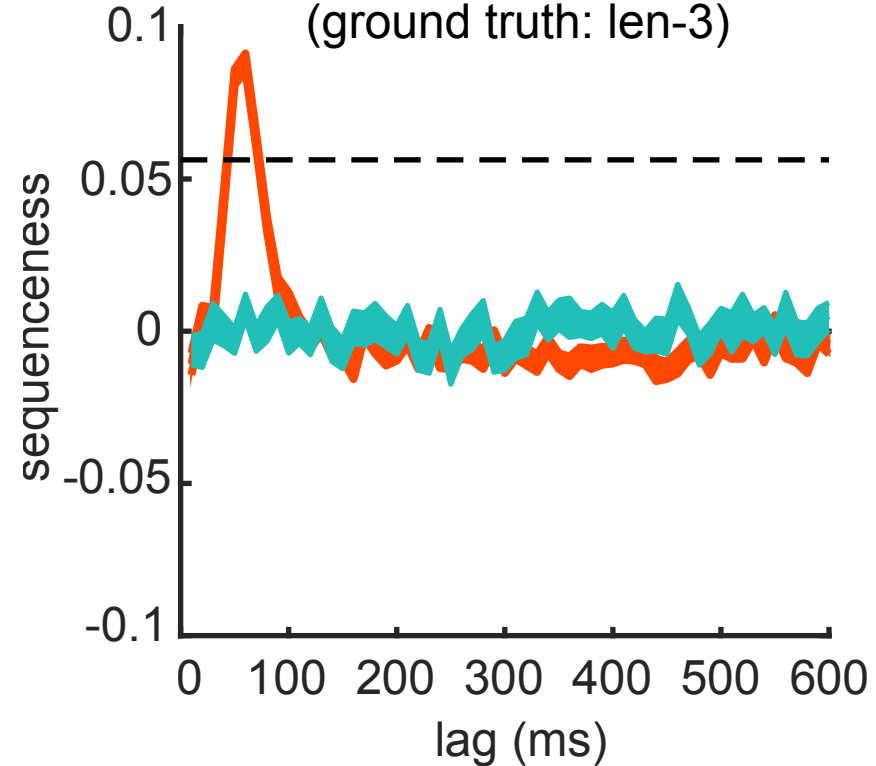**b.**

Length 2

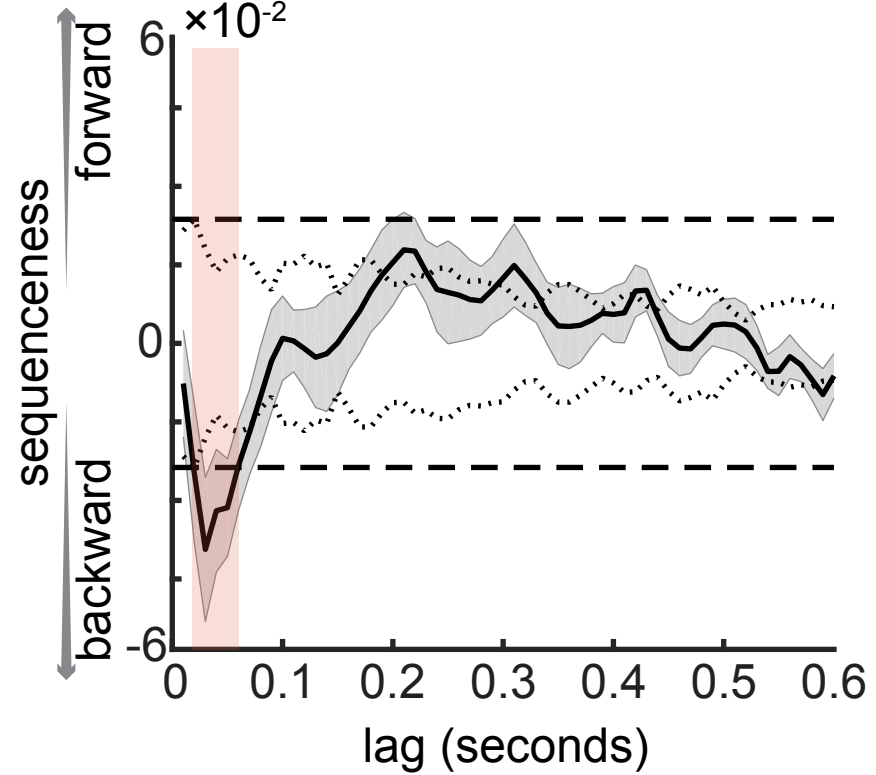

Length 3

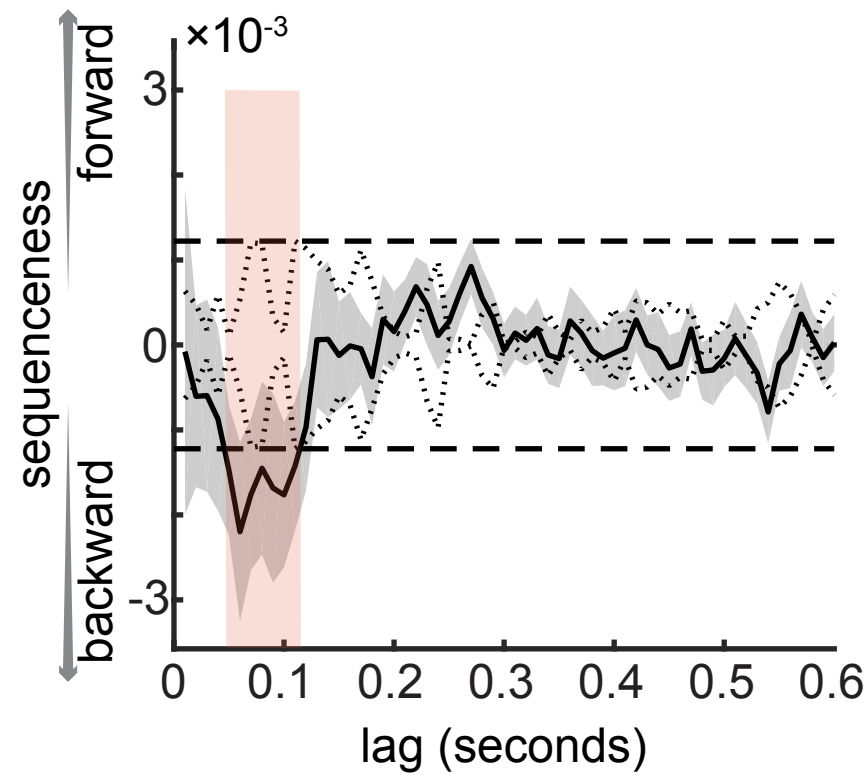

Supplement: supp [file elife-66917-supp-v1.zip]

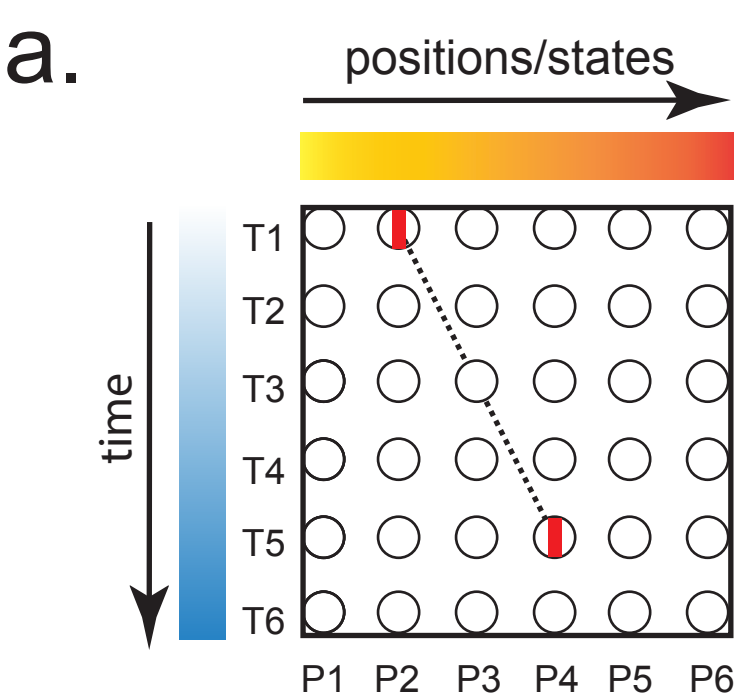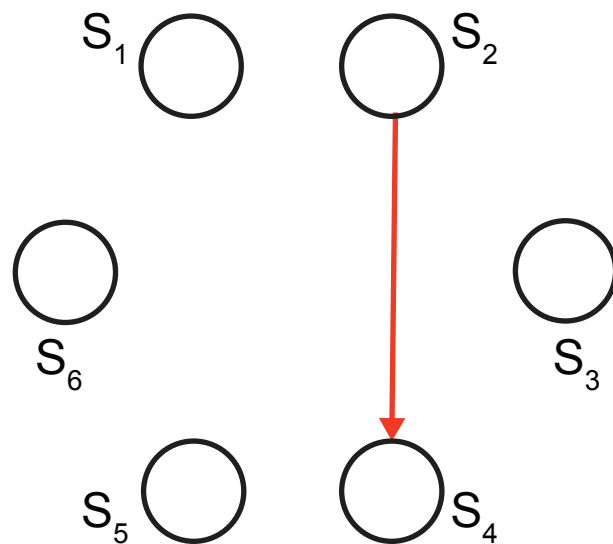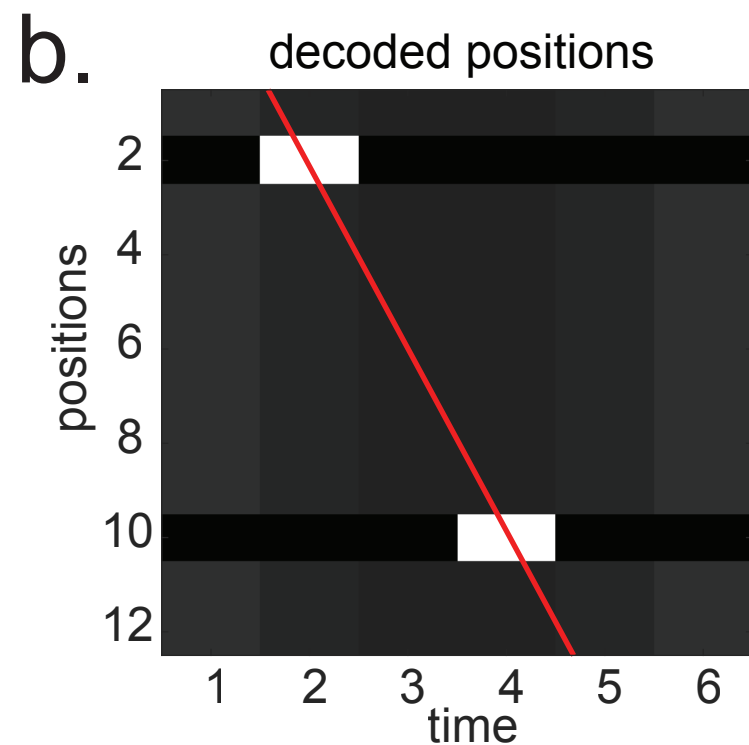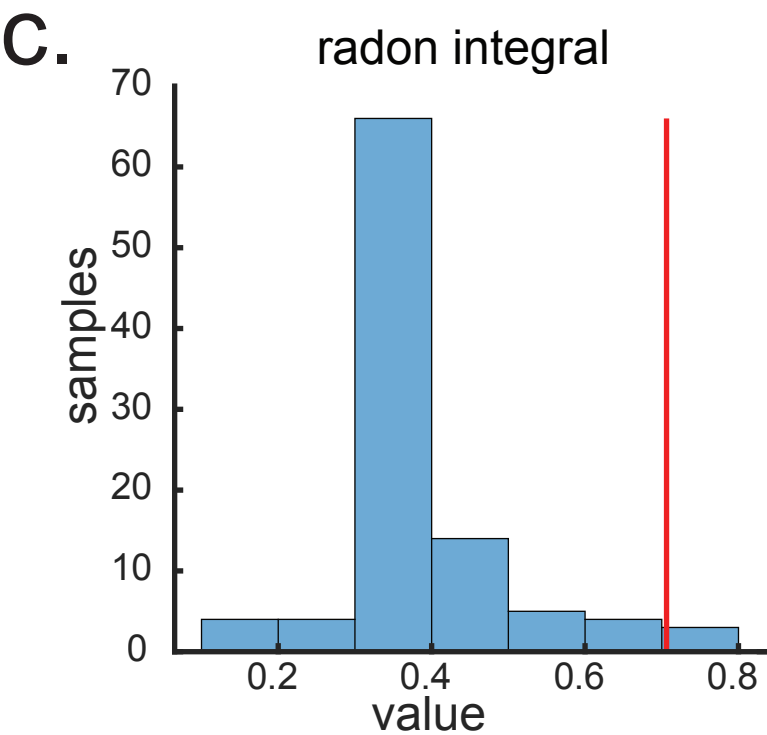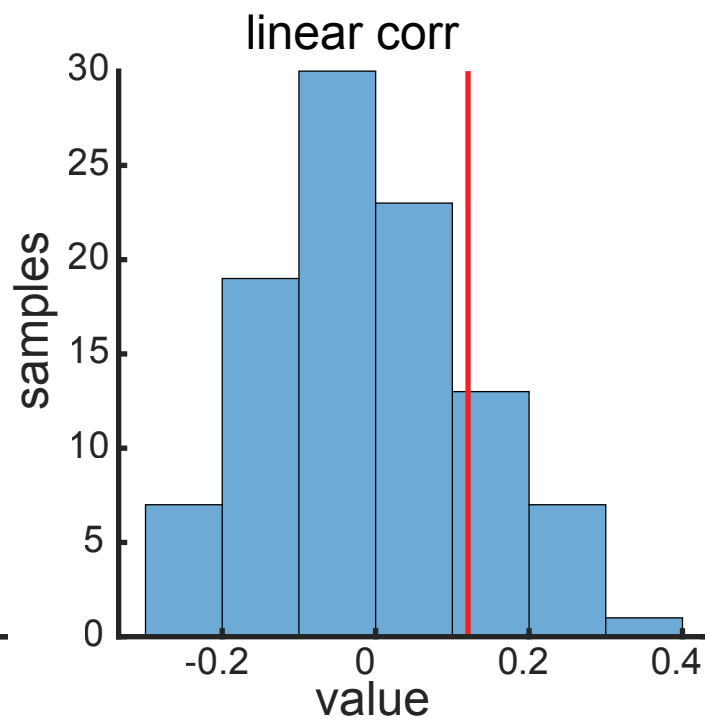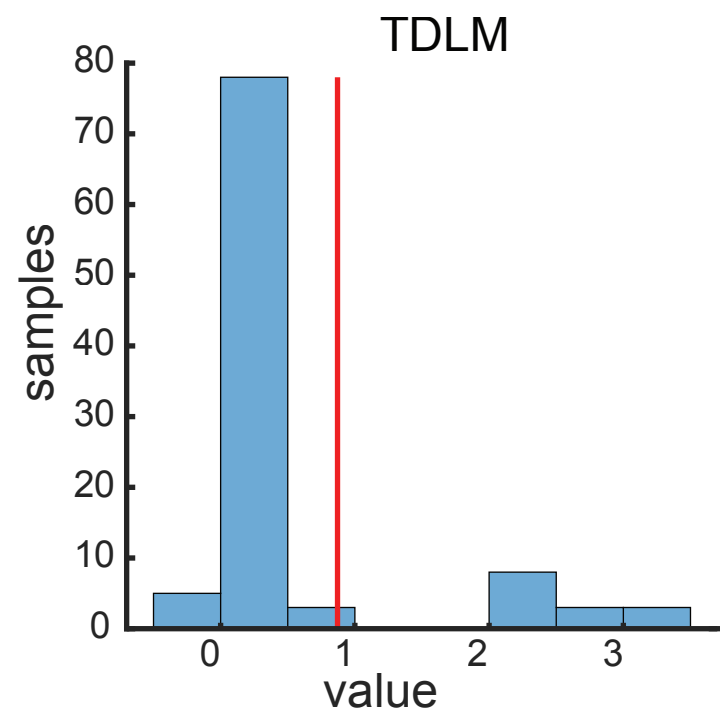

Supplement: supp [file elife-66917-supp-v1.zip]
